# Supplementary material
Source: PubMed Central journal article supplement (PMC9947895)

## **Online Supplement to**

Long-term outcomes of patients with COVID-19 treated with helmet noninvasive ventilation or usual respiratory support: Follow-up study of the Helmet-COVID randomized clinical trial

## Contents

### Supplementary Methods

**Table S1:** Helmet COVID management and writing committees, Data & Safety Monitoring Board and Helmet-COVID site collaborators

**Table S2:** Additional information on 180-day outcome

**Table S3:** Additional baseline characteristics and additional treatments received.

**Table S4:** Per-protocol analysis of outcome measures at 180 days among patients in the helmet noninvasive ventilation and usual respiratory support groups.

**Table S5:** Sensitivity analyses of EQ-5D-5L index values using France and Japan set values in the modified intention-to-treat population.

**Table S6:** Individual EQ-5D-5L dimension levels at 180 days between patients who received helmet noninvasive ventilation and patients who received usual respiratory support.

**Table S7:** Predictors of EuroQol-5D-5L and VAS at day 180 of enrollment among 180-survivors (HRQoL population) and among 28-survivors in the modified intention-to-treat population.

**Table S8:** EuroQol-5D-5L at 180 days between patients who were intubated or not intubated.

**Table S9:** Individual EQ-5D-5L dimension levels at 180 days between patients who were intubated or not intubated.

**Figure S1:** Study Flow Diagram

## **Supplementary Methods**

### **Data**

We collected the following baseline data: demographics, severity of illness, chronic comorbidities, respiratory rate, arterial blood gases, location before ICU admission, chest radiograph findings (number of quadrants with infiltrates), respiratory support and awake prone positioning before randomization, number of days from symptom onset to emergency department visit and ICU admission and number of days from ICU admission to randomization. We also recorded data on the intervention and co-interventions in the ICU up to 28 days after randomization, including respiratory support modalities, settings of the helmet and mask noninvasive ventilation [pressure support level and positive end-expiratory pressure (PEEP)], the number of hours of helmet noninvasive ventilation and other respiratory support modalities, awake prone positioning, dexmedetomidine use, vasopressor therapy and renal replacement therapy. We recorded data on the frequency and duration of invasive mechanical ventilation, the frequency of use of neuromuscular blocker infusion, tracheostomy and therapies with corticosteroids, tocilizumab and COVID-19 antiviral agents. We also recorded the ICU length of stay and hospital length of stay.

### **Post hoc sample size calculation and statistical analysis:**

The sample size of the original trial (n=320) was estimated to provide 80% power to detect a reduction in the primary outcome of 28-day mortality from 40% to 25% accounting for a 5% loss to follow-up. A post hoc analysis indicates that the sample size of the current analysis (n=317) would detect a 15% difference in 180-day mortality considering the observed baseline event rate of 41% with a power of 80%.

Although we have originally planned to use generalized linear mixed models to compare EQ-5D-5L index values and VAS scores between the two groups, we decided to use quantile

regression in order to calculate the median difference which cannot be carried out using GLMM.

**Table S1:** Helmet COVID management and writing committees, Data Safety & Monitoring Board and Helmet COVID site collaborators.

|                                            |                                                                                                                                                                                                                                                                                                                                                                                                                                                                                                                                                                                                                             |
|--------------------------------------------|-----------------------------------------------------------------------------------------------------------------------------------------------------------------------------------------------------------------------------------------------------------------------------------------------------------------------------------------------------------------------------------------------------------------------------------------------------------------------------------------------------------------------------------------------------------------------------------------------------------------------------|
| <b>Management Committee</b>                | Dr. Yaseen M. <b>Arabi</b><br>Dr. Hasan M. <b>Al-Dorzi</b><br>Dr. Haytham <b>Tlayjeh</b><br>Dr. Sara <b>Aldekhyl</b><br>Dr. Saad <b>Al Qahtani</b><br>Dr. Mohammed Khulaif <b>Al Harbi</b><br>Mohammad <b>Al Mutairi</b><br>Hussain <b>Al Haji</b><br>Omar <b>Al Zumai</b><br>Ahmed <b>Alaqeily</b><br>Sheryl Ann <b>Abdukahil</b><br>Eman <b>Al Qasim</b><br>Jesna <b>Jose</b>                                                                                                                                                                                                                                             |
| <b>Writing Committee</b>                   | Dr. Yaseen M. <b>Arabi</b><br>Dr. Hasan <b>Al-Dorzi</b><br>Sheryl Ann <b>Abdukahil</b>                                                                                                                                                                                                                                                                                                                                                                                                                                                                                                                                      |
| <b>Data Safety &amp; Monitoring Board</b>  | Dr. Nicholas <b>Hill</b><br>Dr. Stefano <b>Nava</b><br>Dr. James <b>Mojica</b><br>Dr. Michael <b>Harhay</b>                                                                                                                                                                                                                                                                                                                                                                                                                                                                                                                 |
| <b>Collaborators</b>                       |                                                                                                                                                                                                                                                                                                                                                                                                                                                                                                                                                                                                                             |
| <b>Al Amiri Hospital, Kuwait</b>           | Dr. Abdulrahman <b>Al-Fares</b><br>Ahmed <b>Almumin</b><br>James <b>Albert</b><br>Israr <b>Khan</b><br>Muhammad <b>Ayaz</b>                                                                                                                                                                                                                                                                                                                                                                                                                                                                                                 |
| <b>Aseer Central Hospital, Abha</b>        | Dr. Ali <b>Al Bshabshe</b><br>Dr. Munir Mustafa <b>Aldammad</b><br>Nasser M. <b>Alwadai</b><br>Om Prakash <b>Palanivel</b>                                                                                                                                                                                                                                                                                                                                                                                                                                                                                                  |
| <b>King Abdulaziz Medical City, Riyadh</b> | Dr. Yaseen M. <b>Arabi</b><br>Dr. Hasan M. <b>Al-Dorzi</b><br>Dr. Haytham <b>Tlayjeh</b><br>Dr. Mohammad <b>Al Harbi</b><br>Dr. Sara <b>Aldekhyl</b><br>Dr. Saad <b>Al Qahtani</b><br>Abdulaziz <b>Al-Dawood</b><br>Sheryl Ann I. <b>Abdukahil</b><br>Eman <b>Al Qasim</b><br>Jesna <b>Jose</b><br>Wedyan <b>Al Wehaibi</b><br>Dr. Musharaf <b>Sadat</b><br>Lara <b>Afesh</b><br>Felwa <b>Bin Humaid</b><br>Mohammad <b>Al Mutairi</b><br>Hussain <b>Al Haji</b><br>Omar <b>Al Zumai</b><br>Ahmed <b>Alaqeily</b><br>Yassin <b>Ismaiel</b><br>Faisal <b>Al Baseet</b><br>Mohammad <b>Al Obaidi</b><br>Edgardo <b>Tabhan</b> |

| <b>Collaborators</b>                                                                        |                                                                                                                                                                                                                                                                                                                            |
|---------------------------------------------------------------------------------------------|----------------------------------------------------------------------------------------------------------------------------------------------------------------------------------------------------------------------------------------------------------------------------------------------------------------------------|
|                                                                                             | Rami <b>Al Khalid</b><br>Omar <b>Al Fares</b><br>Abdullah <b>Al Suayb</b><br>Hashem <b>Sammanoudi</b><br>Victoria <b>Burrows</b><br>Amal <b>Matroud</b><br>Brintha <b>Naidu</b>                                                                                                                                            |
| <b>King Abdulaziz University Hospital, Jeddah</b>                                           | Dr. Haifa <b>Algethamy</b><br>Sheryl <b>Lungue</b><br>Dr. Liyakat <b>Khan</b><br>Dr. Moataz <b>Jaber</b><br>Dr. Saleh <b>Baaziz</b><br>Shehla <b>Nuzhat</b>                                                                                                                                                                |
| <b>King Fahd Hospital of the University, Imam Abdulrahman Bin Faisal University, Dammam</b> | Dr. Mohammed S <b>Alshahrani</b><br>Dr. Talal Ali <b>Albrahim</b><br>Laila Perlas <b>Asonto</b><br>Charlene <b>Mapusao</b><br>Arivukodhi <b>Muthu</b><br>Abdulaziz Saad <b>AlGhamdi</b><br>Carmelo <b>Angala</b>                                                                                                           |
| <b>King Fahad Hospital, Madinah</b>                                                         | Dr. Ayman <b>Kharaba</b><br>Mohamed <b>Hussien</b><br>Ahmad <b>AlFar</b><br>Salman <b>Al Asiri</b><br>Anas <b>Al Solami</b>                                                                                                                                                                                                |
| <b>King Faisal Specialist Hospital &amp; Research Center, Riyadh</b>                        | Dr. Zainab <b>Al Duhailib</b><br>Mahmoud <b>Abu Riash</b><br>Haya <b>Al Othaimen</b><br>Rozeena <b>Huma</b>                                                                                                                                                                                                                |
| <b>King Saud Medical City, Riyadh</b>                                                       | Dr. Ahmed <b>Mady</b><br>Naif Abdulrahman <b>Aldosari</b><br>Khalid Abdullah <b>Alreyes</b><br>Arul Prasath <b>Lakshmanan</b><br>Alzahra <b>Al Obaed</b><br>Mobarak <b>Almushhen</b><br>Fhausia <b>Hali</b><br>Ika <b>Fibriantini</b><br>Bobby Rose <b>Marasigan</b><br>Katrina <b>Baguisa</b><br>Saleh Ali <b>Almahwi</b> |
| <b>King Abdulaziz Hospital, Al Ahsa</b>                                                     | Dr. Jamal <b>Chalabi</b>                                                                                                                                                                                                                                                                                                   |
| <b>King Abdulaziz Medical City, Jeddah</b>                                                  | Dr. Fahad <b>Al-Hameed</b>                                                                                                                                                                                                                                                                                                 |
| <b>King Khalid Hospital, Najran</b>                                                         | Dr. Abdulhadi <b>Bin Eshaq</b>                                                                                                                                                                                                                                                                                             |
| <b>King Khalid University Hospital, Riyadh</b>                                              | Dr. Rakan <b>Alqahtani</b>                                                                                                                                                                                                                                                                                                 |
| <b>King Salman Specialist Hospital, Hail</b>                                                | Dr. Omar <b>Alnafel</b>                                                                                                                                                                                                                                                                                                    |
| <b>Saudi Critical Care Society</b>                                                          | Dr. Zohair <b>Al Aseri</b><br>Dr. Awad <b>Al-Omari</b>                                                                                                                                                                                                                                                                     |

**Table S2:** Additional information on 180-day outcome.

| Timing of death                 | Helmet noninvasive ventilation<br>(N=159) | Usual respiratory support<br>(N=158) |
|---------------------------------|-------------------------------------------|--------------------------------------|
| <b>Within the first 28 days</b> | 43                                        | 42                                   |
| <b>Between 28-90 days</b>       | 20                                        | 23                                   |
| In the hospital                 | 18                                        | 23                                   |
| After hospital discharge        | 2                                         | 0                                    |

**Table S3:** Additional baseline characteristics and additional treatments received.

| Characteristic                                                         | Non-survivors by 180 days             |                                  | HRQoL respondents                     |                                  |
|------------------------------------------------------------------------|---------------------------------------|----------------------------------|---------------------------------------|----------------------------------|
|                                                                        | Helmet noninvasive ventilation (N=63) | Usual respiratory support (N=65) | Helmet noninvasive ventilation (N=96) | Usual respiratory support (N=93) |
| <b>Location prior to ICU admission, No. (%)</b>                        |                                       |                                  |                                       |                                  |
| Emergency department                                                   | 30 (47.6)                             | 28 (43.1)                        | 56 (58.3)                             | 57 (61.3)                        |
| Hospital ward                                                          | 24 (38.1)                             | 25 (38.5)                        | 22 (22.9)                             | 27 (29.0)                        |
| Transfer from outside hospital ICU or ward                             | 9 (14.3)                              | 12 (18.5)                        | 18 (18.8)                             | 9 (9.7)                          |
| <b>Quadrants with infiltrates on chest radiograph, median (IQR)</b>    | 4 (3, 4)                              | 4 (3, 4)                         | 4 (3, 4)                              | 4 (3, 4)                         |
| <b>Awake prone positioning</b>                                         | 14 (22.2)                             | 7 (10.8)                         | 80 (83.3)                             | 74 (79.6)                        |
| <b>Days from onset of symptoms to the emergency room, median (IQR)</b> | 4 (2, 8)                              | 5 (3, 8)                         | 6 (4, 9)                              | 5 (3, 8)                         |
| <b>Days from onset of symptoms to ICU admission, median (IQR)</b>      | 6 (4, 10)                             | 7 (5, 11)                        | 8 (5, 10.5)                           | 7 (4, 10)                        |
| <b>Days from ICU admission to randomization, median (IQR)</b>          | 2 (1, 2)                              | 2 (1, 3)                         | 1 (1, 2)                              | 2 (1, 2)                         |
| <b>Days from hospital admission to randomization, median (IQR)</b>     | 3 (2, 5)                              | 3 (2, 6)                         | 2 (2, 4)                              | 2 (2, 4)                         |
| <b>Days from hospital admission to ICU admission, median (IQR)</b>     | 2 (1, 3)                              | 2 (1, 4)                         | 2 (1, 3)                              | 2 (1, 3)                         |
| <b>Additional treatments</b>                                           |                                       |                                  |                                       |                                  |
| Macrolide                                                              | 45 (71.4)                             | 42 (64.6)                        | 66 (68.8)                             | 61 (65.6)                        |
| Beta-lactam/Beta-lactamase inhibitor                                   | 32 (50.8)                             | 42 (64.6)                        | 59 (61.5)                             | 50 (53.8)                        |
| Favipiravir                                                            | 17 (27.0)                             | 20 (30.8)                        | 24 (25.0)                             | 24 (25.8)                        |
| Remdesivir                                                             | 5 (7.9)                               | 6 (9.2)                          | 5 (5.2)                               | 5 (5.4)                          |
| Chloroquine                                                            | 0 (0)                                 | 0 (0)                            | 1 (1.0)                               | 1 (1.1)                          |
| Hydroxychloroquine                                                     | 1 (1.6)                               | 0 (0)                            | 0 (0)                                 | 0 (0)                            |
| Convalescent plasma                                                    | 0 (0)                                 | 0 (0)                            | 1 (1.0)                               | 0 (0)                            |
| Lopinavir/Ritonavir                                                    | 0 (0)                                 | 0 (0)                            | 0 (0)                                 | 0 (0)                            |
| Ribavirin                                                              | 0 (0)                                 | 0 (0)                            | 0 (0)                                 | 0 (0)                            |
| Intravenous immunoglobulin                                             | 0 (0)                                 | 0 (0)                            | 0 (0)                                 | 0 (0)                            |
| Interferon                                                             | 0 (0)                                 | 0 (0)                            | 0 (0)                                 | 0 (0)                            |

ICU, intensive care unit; IQR, interquartile range; NIV



**Table S4:** Per-protocol analysis of outcome measures at 180 days among patients in the helmet noninvasive ventilation and usual respiratory support groups.

|                                         | Helmet noninvasive ventilation<br>(N=146) | Usual respiratory support<br>(N=154) | Risk difference or median difference<br>(95%, CI) | P value |
|-----------------------------------------|-------------------------------------------|--------------------------------------|---------------------------------------------------|---------|
| <b>Per-protocol analysis</b>            |                                           |                                      |                                                   |         |
| Death by 180 days, n/N (%)              | 61/146 (41.8)                             | 63/154 (40.9)                        | 0.87 (-10.28, 12.02)                              | 0.88    |
| <b>EQ-5D-5L index values</b>            |                                           |                                      |                                                   |         |
| Median (IQR)                            | 0.64 (0, 1)                               | 0.67 (0.00, 1.00)                    | -0.02 (-0.35, 0.31)                               | 0.84    |
| Mean ± SD                               | 0.5 (0.45)                                | 0.50 (0.45)                          | -                                                 | -       |
| <b>EQ-VAS</b>                           |                                           |                                      |                                                   |         |
| Median (IQR)                            | 70 (0, 93)                                | 70.0 (0.0, 90.0)                     | 0 (-32.26, 32.26)                                 | 0.79    |
| Mean ± SD                               | 49.9 (43.83)                              | 49.4 (43.06)                         | -                                                 | -       |
| <b>Analysis of the HRQoL population</b> |                                           |                                      |                                                   |         |
| <b>EQ-5D-5L index values</b>            |                                           |                                      |                                                   |         |
| Median (IQR)                            | 1 (0.72, 1)                               | 1 (0.72, 1)                          | 0 (-0.08, 0.08)                                   | 0.96    |
| Mean ± SD                               | 0.86 (0.19)                               | 0.85 (0.21)                          | -                                                 | -       |
| <b>EQ-VAS</b>                           |                                           |                                      |                                                   |         |
| Median (IQR)                            | 90 (76, 100)                              | 85 (75, 100)                         | 5 (-1.41, 11.41)                                  | 0.38    |
| Mean ± SD                               | 85.7 (14.60)                              | 83.6 (16.15)                         | -                                                 | -       |

**Table S5:** Sensitivity analyses of EQ-5D-5L index values using France and Japan set values in the modified intention-to-treat population.

|                                                               | Helmet noninvasive ventilation<br>(N=159) | Usual respiratory support<br>(N=158) | Risk difference or median difference<br>(95%, CI) | P value |
|---------------------------------------------------------------|-------------------------------------------|--------------------------------------|---------------------------------------------------|---------|
| <b>EQ-5D-5L index values using France EQ-5D-5L set values</b> |                                           |                                      |                                                   |         |
| <b>Intention-to-treat analysis</b>                            |                                           |                                      |                                                   |         |
| Median (IQR)                                                  | 0.41 (0, 1)                               | 0.38 (0, 1)                          | 0.02 (-0.29,0.33)                                 | 0.71    |
| Mean ± SD                                                     | 0.46 ± 0.44                               | 0.44 ± 0.45                          |                                                   |         |
| <b>Analysis of the HRQoL population</b>                       |                                           |                                      |                                                   |         |
| Median (IQR)                                                  | 0.96 (0.46, 1)                            | 1.00 (0.45, 1)                       | 0.00 (-0.14,0.14)                                 | 0.95    |
| Mean ± SD                                                     | 0.76 ± 0.31                               | 0.75 ± 0.34                          |                                                   |         |
| <b>EQ-5D-5L index values using Japan EQ-5D-5L set values</b>  |                                           |                                      |                                                   |         |
| <b>Intention-to-treat analysis</b>                            |                                           |                                      |                                                   |         |
| Median (IQR)                                                  | 0.59 (0, 1)                               | 0.58 (0, 1)                          | 0.006 (-0.30,0.31)                                | 0.93    |
| Mean ± SD                                                     | 0.49 ± 0.43                               | 0.48 ± 0.44                          |                                                   |         |
| <b>Analysis of the HRQoL population</b>                       |                                           |                                      |                                                   |         |
| Median (IQR)                                                  | 0.92 (0.61, 1)                            | 1 (0.63, 1)                          | 0.00 (-0.13,0.13)                                 | 0.88    |
| Mean ± SD                                                     | 0.82 ± 0.21                               | 0.81 ± 0.23                          |                                                   |         |

**Table S6:** Individual EQ-5D-5L dimension levels at 180 days between patients who received helmet noninvasive ventilation and patients who received usual respiratory support.

| Dimensions                               | Helmet noninvasive ventilation (N=96) | Usual respiratory support (N=93) | P value* |
|------------------------------------------|---------------------------------------|----------------------------------|----------|
| <b>Mobility, No. (%)</b>                 |                                       |                                  |          |
| No problems walking                      | 57 (59.4)                             | 58 (62.4)                        | 0.83     |
| Slight problems walking                  | 22 (22.9)                             | 19 (20.4)                        |          |
| Moderate problems walking                | 10 (10.4)                             | 8 (8.6)                          |          |
| Severe problems walking                  | 6 (6.3)                               | 5 (5.4)                          |          |
| Unable to walk                           | 1 (1)                                 | 3 (3.2)                          |          |
| <b>Self-care, No. (%)</b>                |                                       |                                  |          |
| No problems washing or dressing          | 67 (69.8)                             | 64 (68.8)                        | 0.65     |
| Slight problems washing or dressing      | 22 (22.9)                             | 17 (18.3)                        |          |
| Moderate problems washing or dressing    | 3 (3.1)                               | 7 (7.5)                          |          |
| Severe problems washing or dressing      | 2 (2.1)                               | 2 (2.2)                          |          |
| Unable to wash or dress                  | 2 (2.1)                               | 3 (3.2)                          |          |
| <b>Usual activities, No. (%)</b>         |                                       |                                  |          |
| No problems doing usual activities       | 62 (64.6)                             | 58 (62.4)                        | 0.91     |
| Slight problems doing usual activities   | 24 (25)                               | 21 (22.6)                        |          |
| Moderate problems doing usual activities | 6 (6.3)                               | 9 (9.7)                          |          |
| Severe problems doing usual activities   | 2 (2.1)                               | 2 (2.2)                          |          |
| Unable to do usual activities            | 2 (2.1)                               | 3 (3.2)                          |          |
| <b>Pain or discomfort, No. (%)</b>       |                                       |                                  |          |
| No pain or discomfort                    | 59 (61.5)                             | 56 (60.2)                        | 0.58     |
| Slight pain or discomfort                | 21 (21.9)                             | 26 (28)                          |          |
| Moderate pain or discomfort              | 14 (14.6)                             | 9 (9.7)                          |          |
| Severe pain or discomfort                | 1 (1)                                 | 2 (2.2)                          |          |
| Extreme pain or discomfort               | 1 (1)                                 | 0                                |          |
| <b>Anxiety or depression, No. (%)</b>    |                                       |                                  |          |
| Not anxious or depressed                 | 68 (70.8)                             | 66 (71)                          | 0.24     |
| Slightly anxious or depressed            | 17 (17.7)                             | 18 (19.4)                        |          |
| Moderately anxious or depressed          | 11 (11.5)                             | 6 (6.5)                          |          |
| Severely anxious or depressed            | 0                                     | 3 (3.2)                          |          |
| Extremely anxious or depressed           | 0                                     | 0                                |          |

EQ-5D-5L, EuroQol, 5 dimensions, 5 levels

\* P value was calculated using Freeman-Halton extension of Fisher test except for the mobility dimension, which was calculated using Chi-square test

**Table S7:** Predictors of EuroQol-5D-5L and VAS at day 180 of enrollment among 180-survivors (HRQoL population) and among 28-survivors in the modified intention-to-treat population. The following variables were included in the multivariable model: receipt of helmet noninvasive ventilation or usual respiratory support, sex, APACHE II score, intubation, age, PaO<sub>2</sub>:FiO<sub>2</sub> ratio at baseline and receipt of dexmedetomidine.

| Variable                                                        | 180-day survivors<br>(HRQoL population)              |         | 28-survivors in the<br>modified intention-to-<br>treat population |         |
|-----------------------------------------------------------------|------------------------------------------------------|---------|-------------------------------------------------------------------|---------|
|                                                                 | EuroQol-5D-5L index<br>median difference<br>(95% CI) | P value | EuroQol-5D-5L index<br>median difference<br>(95% CI)              | P value |
| Helmet noninvasive ventilation versus usual respiratory support | 0.0 (-0.06, 0.06)                                    | >0.99   | 0.0 (-0.04, 0.04)                                                 | >0.99   |
| Female versus male                                              | -0.008 (-0.07, 0.06)                                 | 0.81    | -0.05 (-0.099, 0.001)                                             | 0.055   |
| APACHE >13 versus ≤12                                           | -0.06 (-0.13, 0.003)                                 | 0.06    | -0.08 (-0.15, 0.002)                                              | 0.056   |
| Intubation versus not                                           | -0.21 (-0.26, -0.154)                                | <0.0001 | -0.32 (-0.52, -0.12)                                              | 0.0018  |
| Age >58 versus ≤58*                                             | -0.11 (-0.20, -0.02)                                 | 0.013   | -0.20 (-0.28, -0.11)                                              | <0.0001 |
| PaO <sub>2</sub> :FiO <sub>2</sub> >100 versus ≤100 at baseline | 0.004 (-0.07, 0.07)                                  | 0.91    | 0.05 (0.002, 0.096)                                               | 0.04    |
| Dexmedetomidine use versus not                                  | -0.004 (-0.07, 0.06)                                 | 0.91    | -0.05 (-0.114, 0.016)                                             | 0.14    |

  

| Variable                                                        | VAS median<br>difference (95% CI) | P value  | VAS median<br>difference (95% CI) | P value |
|-----------------------------------------------------------------|-----------------------------------|----------|-----------------------------------|---------|
| Helmet noninvasive ventilation versus usual respiratory support | 0.5 (-3.9, 4.9)                   | 0.82     | 4 (-2.76, 10.76)                  | 0.25    |
| Female versus male                                              | -7.83 (-11.93, -3.74)             | 0.0002   | -5 (-11.48, 1.48)                 | 0.13    |
| APACHE >13 versus ≤12                                           | -3.33 (-7.71, 1.04)               | 0.134    | -4 (-10.90, 2.90)                 | 0.25    |
| Intubation versus not                                           | -11.68 (-16.41, -6.92)            | < 0.0001 | -35 (-58.70, -11.31)              | 0.004   |
| Age >58 versus ≤58                                              | -8.33 (-13.31, -3.35)             | 0.0012   | -11 (-17.99, -4.01)               | 0.002   |
| PaO <sub>2</sub> :FiO <sub>2</sub> >100 versus ≤100 at baseline | -0.500 (-4.96, 3.96)              | 0.83     | -0 (-6.48, -6.48)                 | >0.99   |
| Dexmedetomidine use versus not                                  | -7.88 (-13.33, -2.34)             | 0.006    | -10 (-16.78, -3.23)               | 0.004   |

\* The age cut-off of 58 years is the median age of the cohort

**Table S8:** EuroQol-5D-5L at 180 days between patients who were intubated or not intubated.

|                                         | Intubated<br>(N=155) | Not intubated (N=162) | P value |
|-----------------------------------------|----------------------|-----------------------|---------|
| <b>Intention-to-treat analysis</b>      |                      |                       |         |
| <b>EQ-5D-5L index values</b>            |                      |                       |         |
| Median (IQR)                            | 0 (0, 0.42)          | 1 (0.72, 1)           | <0.0001 |
| Mean ± SD                               | 0.19 ± 0.34          | 0.81 ± 0.31           |         |
| <b>EQ VAS</b>                           |                      |                       |         |
| Median (IQR)                            | 0 (0, 50)            | 90 (75, 100)          | <0.0001 |
| Mean ± SD                               | 19.9 ± 34.15         | 79.2 ± 28.26          |         |
| <b>Analysis of the HRQoL population</b> |                      |                       |         |
| <b>EQ-5D-5L index values</b>            |                      |                       |         |
| Median (IQR)                            | 0.70 (0.64, 0.85)    | 1 (0.81, 1)           | <0.0001 |
| Mean ± SD                               | 0.71 ± 0.21          | 0.89 ± 0.17           |         |
| <b>EQ VAS</b>                           |                      |                       |         |
| Median (IQR)                            | 80 (60, 85)          | 90 (80, 100)          | <0.0001 |
| Mean ± SD                               | 73.6 ± 18.41         | 87.3 ± 13.06          |         |

EQ-5D-5L, EuroQol-5 dimensions-5 levels; IQR, interquartile range; SD, standard deviation; VAS visual analogue scale.

**Table S9:** Individual EQ-5D-5L dimension levels at 180 days between patients who were intubated or not intubated.

| Dimensions                               | Intubated<br>(N=42) | Not intubated<br>(N=147) | P value  |
|------------------------------------------|---------------------|--------------------------|----------|
| <b>Mobility, No. (%)</b>                 |                     |                          |          |
| No problems walking                      | 10 (23.8)           | 105 (71.4)               | < 0.0001 |
| Slight problems walking                  | 15 (35.7)           | 26 (17.7)                |          |
| Moderate problems walking                | 10 (23.8)           | 8 (5.4)                  |          |
| Severe problems walking                  | 5 (11.9)            | 6 (4.1)                  |          |
| Unable to walk                           | 2 (4.8)             | 2 (1.4)                  |          |
| <b>Self-care, No. (%)</b>                |                     |                          |          |
| No problems washing or dressing          | 16 (38.1)           | 115 (78.2)               | < 0.0001 |
| Slight problems washing or dressing      | 17 (40.5)           | 22 (15)                  |          |
| Moderate problems washing or dressing    | 4 (9.5)             | 6 (4.1)                  |          |
| Severe problems washing or dressing      | 3 (7.1)             | 1 (0.7)                  |          |
| Unable to wash or dress                  | 2 (4.8)             | 3 (2)                    |          |
| <b>Usual activities, No. (%)</b>         |                     |                          |          |
| No problems doing usual activities       | 11 (26.2)           | 109 (74.1)               | < 0.0001 |
| Slight problems doing usual activities   | 20 (47.6)           | 25 (17)                  |          |
| Moderate problems doing usual activities | 6 (14.3)            | 9 (6.1)                  |          |
| Severe problems doing usual activities   | 3 (7.1)             | 1 (0.7)                  |          |
| Unable to do usual activities            | 2 (4.8)             | 3 (2)                    |          |
| <b>Pain or discomfort, No. (%)</b>       |                     |                          |          |
| No pain or discomfort                    | 12 (28.6)           | 103 (70.1)               | < 0.0001 |
| Slight pain or discomfort                | 18 (42.9)           | 29 (19.7)                |          |
| Moderate pain or discomfort              | 10 (23.8)           | 13 (8.8)                 |          |
| Severe pain or discomfort                | 2 (4.8)             | 1 (0.7)                  |          |
| Extreme pain or discomfort               | 0                   | 1 (0.7)                  |          |
| <b>Anxiety or depression, No. (%)</b>    |                     |                          |          |
| Not anxious or depressed                 | 20 (47.6)           | 114 (77.6)               | < 0.0001 |
| Slightly anxious or depressed            | 11 (26.2)           | 24 (16.3)                |          |
| Moderately anxious or depressed          | 8 (19)              | 9 (6.1)                  |          |
| Severely anxious or depressed            | 3 (7.1)             | 0                        |          |
| Extremely anxious or depressed           | 0                   | 0                        |          |

\* All p values were calculated using Freeman-Halton extension of Fisher test

**Figure S1:** Flow diagram.

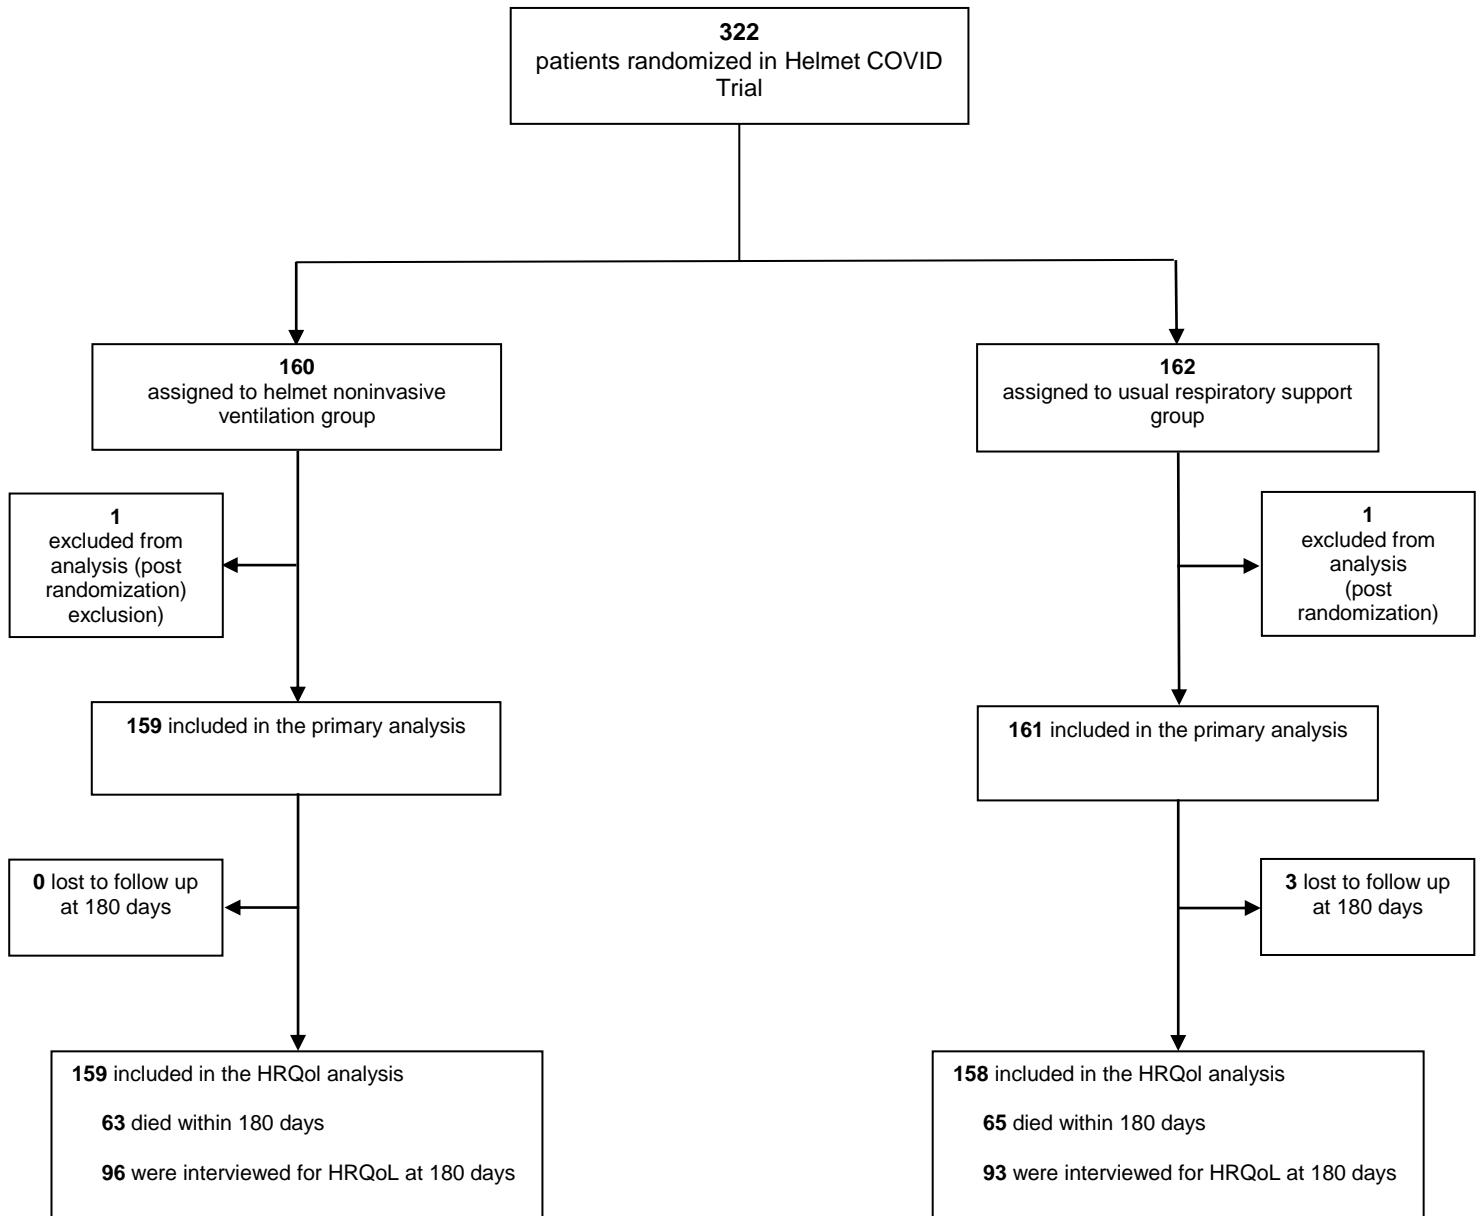

Supplement: 134_2023_6981_MOESM1_ESM.pdf [file 134_2023_6981_MOESM1_ESM.pdf]
